# Supplementary material for: Pioneering Use of Ionic Liquid‐Based Aqueous Biphasic Systems as Membrane‐Free Batteries
Source: PubMed Central journal article supplement (PMC6193149; doi:10.1002/advs.201800576), 2018-08-08
Supplement: ADVS-5-1800576-s001.pdf [file ADVS-5-1800576-s001.pdf]

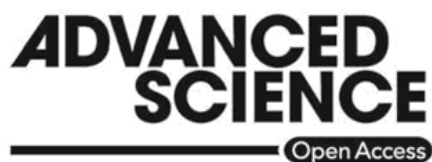

## Supporting Information

for *Adv. Sci.*, DOI: 10.1002/advs.201800576

**Pioneering Use of Ionic Liquid-Based Aqueous Biphasic Systems as Membrane-Free Batteries**

*Paula Navalpotro, Catarina M. S. S. Neves, Jesus Palma, Mara G. Freire, João A. P. Coutinho,\* and Rebeca Marcilla\**

### Pioneering use of Ionic Liquid-based Aqueous Biphasic Systems as Membrane-Free Batteries

*Paula Navalpotro, Catarina M. S. S. Neves, Jesus Palma, Mara G. Freire, João A. P. Coutinho\*, Rebeca Marcilla\**

**Table S1.** Experimental weight fraction data for the ABS composed of IL (1) + Na<sub>2</sub>SO<sub>4</sub> (2) + H<sub>2</sub>O (3) at (25 ± 1)°C and atmospheric pressure

| [P <sub>4444</sub> ]Br |                    | [N <sub>4444</sub> ]Br |                    | [P <sub>44414</sub> ]Cl |                    | [P <sub>4444</sub> ]CF <sub>3</sub> CO <sub>2</sub> |                    |
|------------------------|--------------------|------------------------|--------------------|-------------------------|--------------------|-----------------------------------------------------|--------------------|
| 100 w <sub>1</sub>     | 100 w <sub>2</sub> | 100 w <sub>1</sub>     | 100 w <sub>2</sub> | 100 w <sub>1</sub>      | 100 w <sub>2</sub> | 100 w <sub>1</sub>                                  | 100 w <sub>2</sub> |
| 76.0416                | 0.5827             | 70.5266                | 0.9226             | 77.7875                 | 0.5163             | 64.5195                                             | 0.7558             |
| 57.1419                | 0.8702             | 53.0932                | 1.4811             | 67.9881                 | 1.0010             | 21.3676                                             | 0.4425             |
| 53.1714                | 1.1917             | 45.6478                | 2.1867             | 54.6428                 | 1.2530             | 19.1751                                             | 0.6022             |
| 49.5426                | 1.4947             | 42.2385                | 2.2860             | 52.2440                 | 1.7239             | 16.9889                                             | 0.7135             |
| 46.2156                | 1.7927             | 39.4644                | 2.6387             | 48.4836                 | 2.2617             | 16.1704                                             | 0.9283             |
| 44.0716                | 2.0683             | 37.9119                | 3.0684             | 45.8706                 | 2.4731             | 15.4688                                             | 1.1012             |
| 41.8956                | 2.3203             | 35.6525                | 3.4500             | 43.9138                 | 2.9243             | 14.6183                                             | 1.3163             |
| 40.0971                | 2.4473             | 34.8690                | 3.5500             | 41.0066                 | 3.5717             | 13.8178                                             | 1.4557             |
| 38.7917                | 2.7243             | 33.8901                | 3.7847             | 38.9789                 | 3.8181             | 13.3562                                             | 1.4972             |
| 37.1008                | 2.9805             | 32.9270                | 4.0631             | 36.9146                 | 4.0072             | 12.6652                                             | 1.6090             |
| 36.0443                | 3.2123             | 32.1164                | 4.2620             | 35.8923                 | 4.2282             | 12.1517                                             | 1.8152             |
| 34.7007                | 3.3751             | 31.4217                | 4.3865             | 34.8870                 | 4.4466             | 11.3996                                             | 1.9558             |
| 33.8652                | 3.5922             | 29.7601                | 4.8531             | 34.2031                 | 4.5973             | 11.0193                                             | 2.2139             |
| 33.0874                | 3.7434             | 28.7320                | 5.2710             | 33.2489                 | 4.7587             | 10.6211                                             | 2.3835             |
| 32.2844                | 3.9201             | 27.3902                | 5.8728             | 32.0912                 | 5.0947             | 10.3603                                             | 2.4843             |
| 31.6342                | 4.0714             | 25.9829                | 6.2356             | 31.2656                 | 5.2223             | 10.0249                                             | 2.6056             |
| 30.9671                | 4.2169             | 25.2746                | 6.4822             | 30.7176                 | 5.4409             | 9.8097                                              | 2.7934             |
| 30.2561                | 4.3454             | 23.8125                | 7.1264             | 30.2124                 | 5.6099             | 9.4666                                              | 3.0156             |

|         |        |         |         |         |         |        |        |
|---------|--------|---------|---------|---------|---------|--------|--------|
| 29.5927 | 4.4754 | 23.1106 | 7.3774  | 29.5830 | 5.7229  | 9.0835 | 3.1802 |
| 28.6494 | 4.7670 | 22.2590 | 7.7877  | 28.5740 | 6.0634  | 8.6998 | 3.4926 |
| 28.0238 | 4.8944 | 21.2621 | 8.3267  | 27.3485 | 6.5699  | 8.4060 | 3.5908 |
| 27.4836 | 5.0192 | 19.4724 | 9.0055  | 26.6159 | 6.6383  | 8.0282 | 3.8784 |
| 26.6511 | 5.3037 | 18.0635 | 9.6974  | 25.7872 | 6.9143  | 7.6409 | 4.2080 |
| 26.1236 | 5.4095 | 17.1980 | 10.1396 | 25.1373 | 7.1038  | 7.3008 | 4.4243 |
| 25.3226 | 5.6687 | 16.0636 | 10.7451 | 24.3917 | 7.3473  | 7.0751 | 4.5592 |
| 24.4060 | 5.8638 | 15.0388 | 11.3004 | 23.7924 | 7.5417  | 6.8987 | 4.7435 |
| 23.7291 | 6.1011 | 14.2384 | 11.7025 | 22.8776 | 7.9455  | 6.7222 | 4.8622 |
| 22.6068 | 6.4275 | 13.8911 | 11.8853 | 22.2268 | 8.1529  | 6.5080 | 5.1017 |
| 21.6711 | 6.7074 | 13.2753 | 12.2148 | 21.8015 | 8.2184  | 6.3355 | 5.2528 |
| 20.7534 | 6.9675 | 12.5771 | 12.6086 | 21.2983 | 8.3737  | 6.2003 | 5.4231 |
| 19.9331 | 7.2042 | 12.2397 | 12.8124 | 20.7735 | 8.5680  | 6.0622 | 5.5250 |
| 19.4470 | 7.3843 | 11.5740 | 13.2055 | 20.0898 | 8.8750  | 5.9945 | 5.5968 |
| 18.7182 | 7.6077 | 11.1941 | 13.4506 | 19.7543 | 8.9293  | 5.8286 | 5.7641 |
| 18.3162 | 7.7461 | 10.5851 | 13.7876 | 19.1548 | 9.1614  | 5.6991 | 5.9206 |
| 17.9326 | 7.8797 | 10.2463 | 14.0419 | 18.7297 | 9.3122  | 5.4404 | 6.2140 |
| 17.6900 | 7.9180 | 9.7049  | 14.3726 | 18.3205 | 9.4655  | 5.2304 | 6.4346 |
| 17.3327 | 8.0473 | 9.1335  | 14.7616 | 17.7938 | 9.7145  | 5.1202 | 6.5765 |
| 17.0159 | 8.1659 | 8.7503  | 15.0218 | 17.4196 | 10.9491 | 5.0090 | 6.8628 |
| 16.8050 | 8.2003 | 8.3231  | 15.3271 | 17.1235 | 10.9714 | 4.8336 | 7.0384 |
| 16.4917 | 8.3116 | 8.1205  | 15.4725 | 16.7682 | 11.0565 | 4.6743 | 7.2279 |
| 16.1744 | 8.4290 | 7.5970  | 15.8709 | 16.3080 | 11.2645 | 4.4838 | 7.6148 |
| 15.8764 | 8.5303 | 6.8672  | 16.4982 | 15.7537 | 11.3777 | 4.1889 | 8.0460 |
| 15.5685 | 8.6485 |         |         | 15.3744 | 11.5608 |        |        |
| 15.2964 | 8.7527 |         |         | 14.8516 | 11.7250 |        |        |
| 15.0058 | 8.8602 |         |         | 14.1825 | 12.0069 |        |        |
| 14.7480 | 8.9647 |         |         | 13.5656 | 12.2561 |        |        |
| 14.4869 | 9.0610 |         |         | 13.0810 | 12.4397 |        |        |
| 14.2331 | 9.1588 |         |         | 12.4947 | 12.7397 |        |        |

|         |         |         |         |
|---------|---------|---------|---------|
| 13.9987 | 9.2517  | 12.0407 | 12.9407 |
| 13.6985 | 9.3927  | 11.2242 | 13.5107 |
| 13.4830 | 9.4623  | 10.4527 | 14.0216 |
| 13.2559 | 9.5495  | 9.9478  | 14.1936 |
| 13.0463 | 9.6325  | 9.3760  | 14.5200 |
| 12.7624 | 9.7633  | 7.9482  | 15.8233 |
| 12.2483 | 10.0065 | 5.8407  |         |
| 11.9940 | 10.1278 |         |         |
| 11.7489 | 10.2494 |         |         |
| 11.5202 | 10.3553 |         |         |
| 11.2980 | 10.4518 |         |         |
| 11.0809 | 10.5518 |         |         |
| 10.8770 | 10.6553 |         |         |
| 10.6220 | 10.8012 |         |         |
| 10.4299 | 10.8964 |         |         |
| 10.2026 | 11.0219 |         |         |
| 10.0236 | 11.1105 |         |         |
| 9.8091  | 11.2313 |         |         |
| 9.5975  | 11.3514 |         |         |
| 9.3998  | 11.4619 |         |         |
| 9.2076  | 11.5689 |         |         |
| 9.0280  | 11.6688 |         |         |
| 8.6407  | 11.9048 |         |         |
| 8.4414  | 12.0323 |         |         |
| 8.0656  | 12.2760 |         |         |
| 7.6564  | 12.5538 |         |         |
| 7.2366  | 12.8498 |         |         |
| 6.7462  | 13.2405 |         |         |
| 6.2438  | 13.6538 |         |         |
| 5.5389  | 14.2850 |         |         |

**Table S2.** Parameters *A*, *B* and *C* obtained from Merchuk fitting <sup>[21]</sup> (equation (1) for each ABS tested.

| IL                                                     | <i>A</i> ± $\sigma$ | <i>B</i> ± $\sigma$ | $10^5(C \pm \sigma)$ | <i>R</i> <sup>2</sup> |
|--------------------------------------------------------|---------------------|---------------------|----------------------|-----------------------|
| [C <sub>4</sub> mim][CF <sub>3</sub> SO <sub>3</sub> ] | 155.2 ± 8.3         | -0.950 ±<br>0.033   | 4.97 ± 0.10          | 0.996                 |
| [C <sub>4</sub> mim][N(CN) <sub>2</sub> ]              | 78.2 ± 1.7          | -0.402 ±<br>0.015   | 31.56 ± 5.24         | 0.991                 |
| [P <sub>44414</sub> ]Cl                                | 105.0 ± 2.9         | -0.520 ±<br>0.014   | 13.10 ± 2.07         | 0.998                 |
| [P <sub>4444</sub> ]Br                                 | 95.2 ± 1.0          | -0.538 ±<br>0.006   | 33.18 ± 1.21         | 0.985                 |
| [N <sub>4444</sub> ]Br                                 | 81.3 ± 1.7          | -0.441 ±<br>0.010   | 15.00 ± 8.56         | 0.972                 |
| [P <sub>4444</sub> ][CF <sub>3</sub> CO <sub>2</sub> ] | 31.1 ± 0.9          | -0.690 ±<br>0.022   | 8.55 ± 12.78         | 0.997                 |

**Table S3.** Experimental data for TLs and TLLs of IL + Na<sub>2</sub>SO<sub>4</sub> aqueous biphasic systems. Length of Tie line (TLL) and  $\alpha$  were obtained from equation 2-6. pH values of all the studied IL-based ABS.

| IL                                                     | <i>Weight fraction composition / wt%</i> |                     |                        |                     | TLL   | $\alpha$ | pH   |
|--------------------------------------------------------|------------------------------------------|---------------------|------------------------|---------------------|-------|----------|------|
|                                                        | [IL] <sub>T</sub>                        | [Salt] <sub>T</sub> | [IL] <sub>B</sub>      | [Salt] <sub>B</sub> |       |          |      |
| [C <sub>4</sub> mim][CF <sub>3</sub> SO <sub>3</sub> ] | 53.17                                    | 1.27                | 0.36                   | 27.67               | 59.04 | 0.649    | 4.6  |
| [C <sub>4</sub> mim][N(CN) <sub>2</sub> ]              | 54.83                                    | 0.97                | 0.24                   | 26.03               | 60.06 | 0.648    | 8.2  |
| [P <sub>44414</sub> ] <sub>Cl</sub>                    | 61.51                                    | 0.86                | 0.89                   | 24.16               | 64.94 | 0.551    | 4.4  |
| [P <sub>4444</sub> ] <sub>Br</sub>                     | 64.74                                    | 0.51                | 0.18                   | 22.35               | 68.15 | 0.543    | 3.1  |
| [N <sub>4444</sub> ] <sub>Br</sub>                     | 54.29                                    | 1.11                | 1.05                   | 26.23               | 58.87 | 0.650    | 4.9  |
| [P <sub>4444</sub> ][CF <sub>3</sub> CO <sub>2</sub> ] | 22.79                                    | 0.72                | 6.01·10 <sup>-16</sup> | 61.55               | 64.97 | 0.439    | 11.6 |

**Table S4.** Partition coefficients ( $K$ ) calculated according to equation 7 as the ratio of concentrations of each compound in the two immiscible phases of all the studied acidic-neutral  $\text{Na}_2\text{SO}_4$ -based ABS and octanol-water system.

| <b>IL+ <math>\text{Na}_2\text{SO}_4</math> + <math>\text{H}_2\text{O}</math></b> | <b>TEMPO</b>        | <b><math>\text{H}_2\text{Q}</math></b> | <b>AQ2S</b> | <b>QUI</b> | <b>MV</b>            |
|----------------------------------------------------------------------------------|---------------------|----------------------------------------|-------------|------------|----------------------|
| [C <sub>4</sub> mim][CF <sub>3</sub> SO <sub>3</sub> ]                           | $3.6 \cdot 10^{-3}$ | 0.21                                   | 0.02        | 0.14       | 2.89                 |
| [C <sub>4</sub> mim][N(CN) <sub>2</sub> ]                                        | 3.56                | 13.53                                  | 98.86       | 11.49      | 0.72                 |
| [P <sub>44414</sub> ]Cl                                                          | 6.55                | 3.39                                   | 13.15       | 10.31      | 0.02                 |
| [P <sub>4444</sub> ]Br                                                           | 84.19               | 16.47                                  | 16.95       | 226.66     | 0.09                 |
| [N <sub>4444</sub> ]Br                                                           | 55.86               | 4.05                                   | 12.43       | 120.00     | 0.13                 |
| [P <sub>4444</sub> ][CF <sub>3</sub> CO <sub>2</sub> ]                           | 3.96                | 2.08                                   | 25.89       | 185.22     | $5.3 \cdot 10^{-3}$  |
| <b>octanol -water<br/>(<math>K_{ow}</math>)</b>                                  | 125.89              | 3.89                                   | 1.55        | 20.89      | $1.99 \cdot 10^{-7}$ |

**Table S5.** Selectivity ( $S$ ) calculated as the ratio of partition coefficient of the target molecule and MV ( $K_{molecule}/K_{MV}$ ) in each ABS.

| <b>IL+ <math>\text{Na}_2\text{SO}_4</math> + <math>\text{H}_2\text{O}</math></b> | <b><math>\text{H}_2\text{Q}</math></b> | <b>AQ2S</b>          | <b>QUI</b>           | <b>TEMPO</b>         |
|----------------------------------------------------------------------------------|----------------------------------------|----------------------|----------------------|----------------------|
| [C <sub>4</sub> mim][CF <sub>3</sub> SO <sub>3</sub> ]                           | $7.41 \cdot 10^{-2}$                   | $0.60 \cdot 10^{-2}$ | $4.67 \cdot 10^{-2}$ | $0.12 \cdot 10^{-2}$ |
| [C <sub>4</sub> mim][N(CN) <sub>2</sub> ]                                        | 18.89                                  | 138.07               | 16.05                | 4.97                 |
| [P <sub>44414</sub> ]Cl                                                          | 138.26                                 | 536.80               | 420.91               | 267.35               |
| [P <sub>4444</sub> ]Br                                                           | 178.44                                 | 183.57               | 2455.69              | 912.13               |
| [N <sub>4444</sub> ]Br                                                           | 30.45                                  | 93.46                | 902.25               | 420.00               |
| [P <sub>4444</sub> ][CF <sub>3</sub> CO <sub>2</sub> ]                           | 391.70                                 | 4884.91              | 34947.16             | 747.55               |

**Table S6.** Potential redox reaction of majority specie in each phase of a system based on  $[P_{44414}]Cl+Na_2SO_4$ 

| Combinati<br>on     | TOP Phase                  |                  |               |                  |                  | BOTTOM Phase                  |                               |               |                  |                  | OC<br>V |                        |
|---------------------|----------------------------|------------------|---------------|------------------|------------------|-------------------------------|-------------------------------|---------------|------------------|------------------|---------|------------------------|
|                     | Active<br>Species<br>(A.S) | A.S.<br>Majority | $E^0$<br>(V*) | $E_{pa}$<br>(V*) | $E_{pc}$<br>(V*) | $\Delta E$<br>p<br>(V)        | A. S.<br>Majorit<br>y         | $E^0$<br>(V*) | $E_{pa}$<br>(V*) | $E_{pc}$<br>(V*) |         | $\Delta E$<br>p<br>(V) |
| MV-AQ2S             | 1 <sup>st</sup><br>step    | AQ2              | -0.57         | -0.53            | -0.61            | 0.08                          | 1 <sup>st</sup><br>step       | -0.64         | -0.62            | -0.66            | 0.04    | -                      |
|                     | 2 <sup>nd</sup><br>step    | S                | -0.76         | -0.73            | -0.79            | 0.06                          | MV<br>2 <sup>nd</sup><br>step | -0.85         | -0.77            | -0.93            | 0.16    |                        |
| MV-QUI              |                            | QUI              | -0.94         | -0.72            | -1.15            | 0.43                          | 1 <sup>st</sup><br>step       | -0.68         | -0.65            | -0.71            | 0.05    | -                      |
|                     |                            |                  |               |                  |                  | MV<br>2 <sup>nd</sup><br>step | -0.91                         | -0.76         | -0.99            | 0.15             |         |                        |
| MV-H <sub>2</sub> Q |                            | H <sub>2</sub> Q | 0.31          | 0.56             | 0.06             | 0.50                          | 1 <sup>st</sup><br>step       | -0.64         | -0.55            | -0.73            | 0.18    | 1.16                   |
|                     |                            |                  |               |                  |                  | MV<br>2 <sup>nd</sup><br>step | -0.86                         | -0.8          | -0.92            | 0.12             |         |                        |
| MV-<br>TEMPO        | 1 <sup>st</sup><br>step    | TEMPO            | 0.66          | 0.7              | 0.63             | 0.07                          | 1 <sup>st</sup><br>step       | -0.67         | -0.63            | -0.72            | 0.09    | 1.33                   |
|                     | 2 <sup>nd</sup><br>step    |                  |               |                  |                  |                               | MV<br>2 <sup>nd</sup><br>step | -0.93         | -0.9             | -0.97            | 0.07    | 1.6                    |

\*Potential vs Ag/AgCl reference electrode



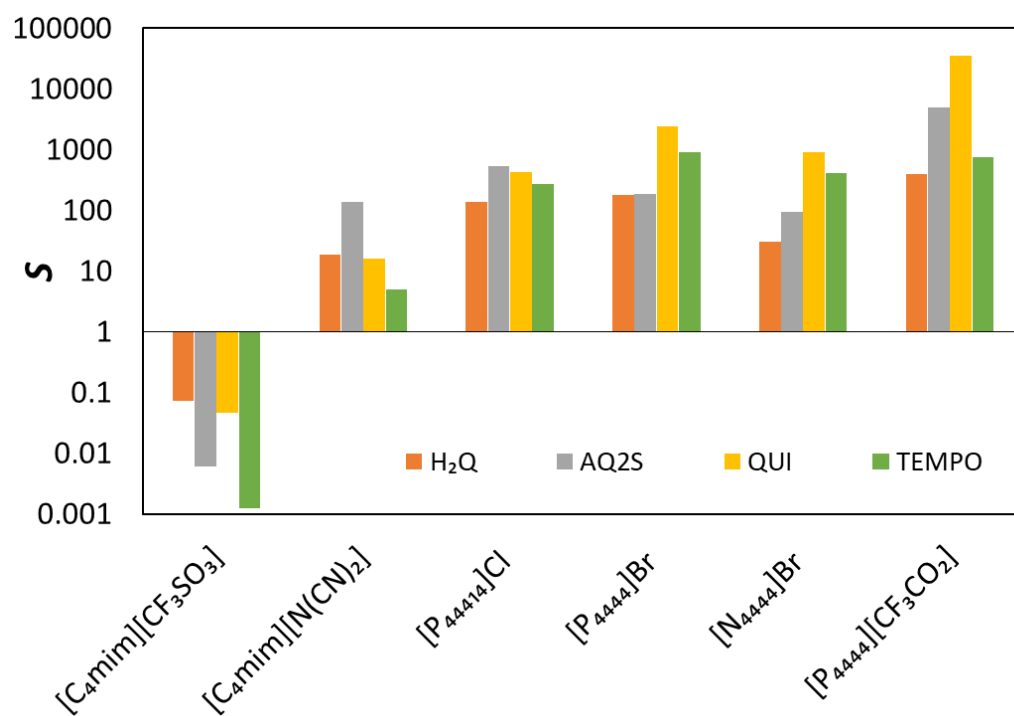

**Figure S1.** Selectivity of the target molecules with respect to MV

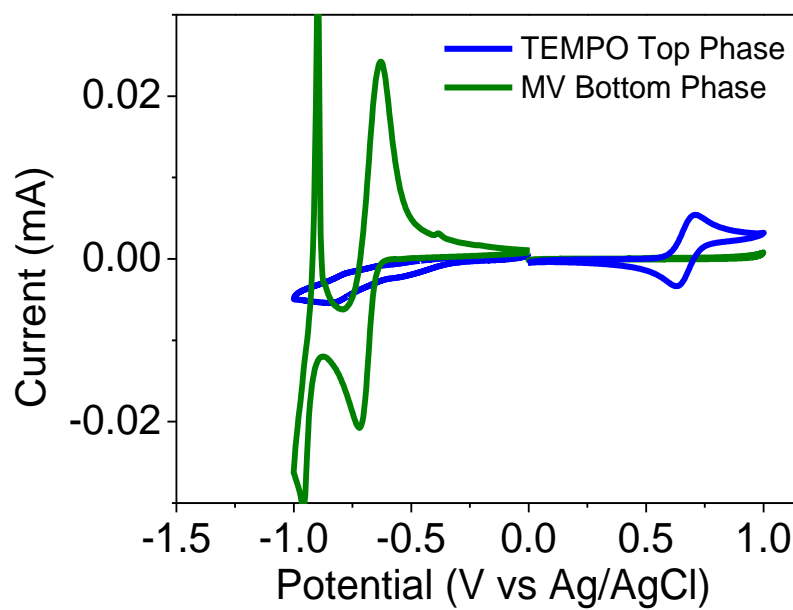

**Figure S2.** CV of each phase in the whole range of potential for the system based on P<sub>44414</sub>Cl with MV+TEMPO at 20 mM concentration.

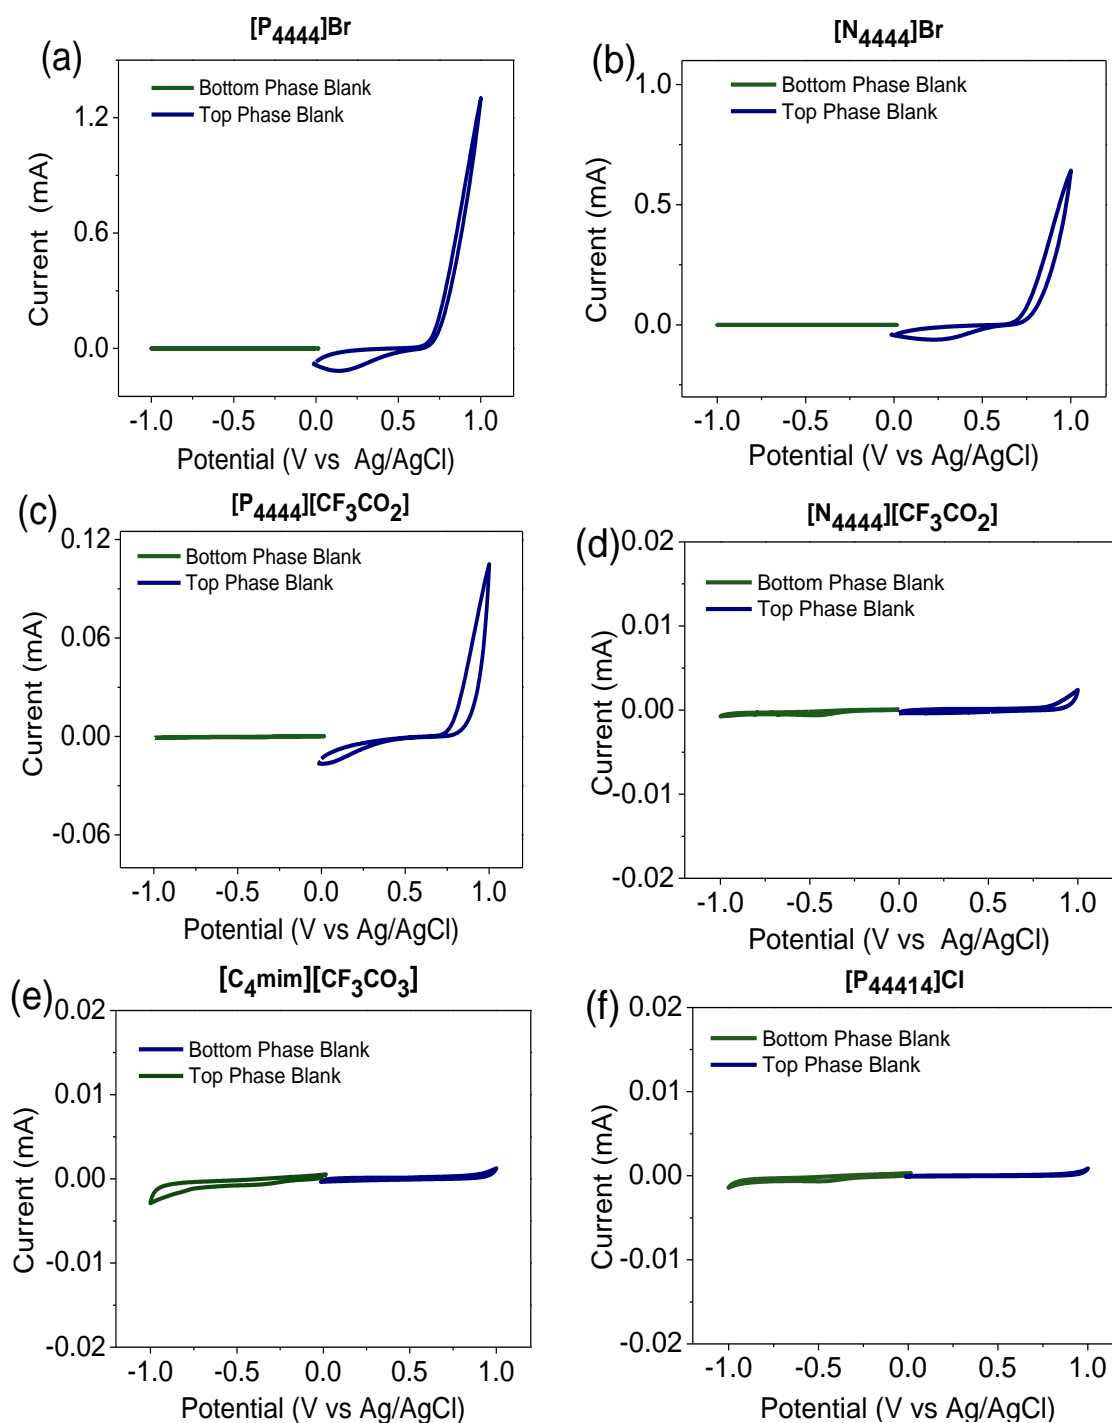

**Figure S3.** Cyclic voltammetry of separated phases of the IL-based ABS without active species (blanks). (a) [P<sub>4444</sub>]<sup>+</sup>Br<sup>-</sup>. (b) [N<sub>4444</sub>]<sup>+</sup>Br<sup>-</sup>. (c) [P<sub>4444</sub>]<sup>+</sup>[CF<sub>3</sub>CO<sub>2</sub>]<sup>-</sup>. (d) [N<sub>4444</sub>]<sup>+</sup>[CF<sub>3</sub>CO<sub>2</sub>]<sup>-</sup>. (e) [C<sub>4</sub>mim]<sup>+</sup>[CF<sub>3</sub>SO<sub>3</sub>]<sup>-</sup>. (f) [P<sub>44414</sub>]<sup>+</sup>Cl<sup>-</sup>. Scan rate 10 mV s<sup>-1</sup>.

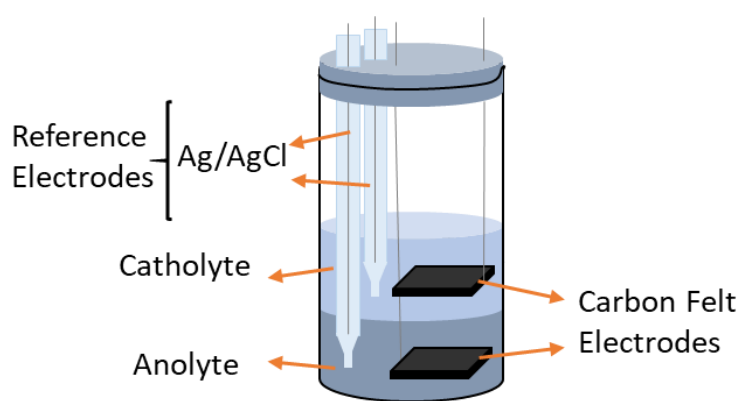

**Figure S4.** Schematic Illustration of the battery assembly.

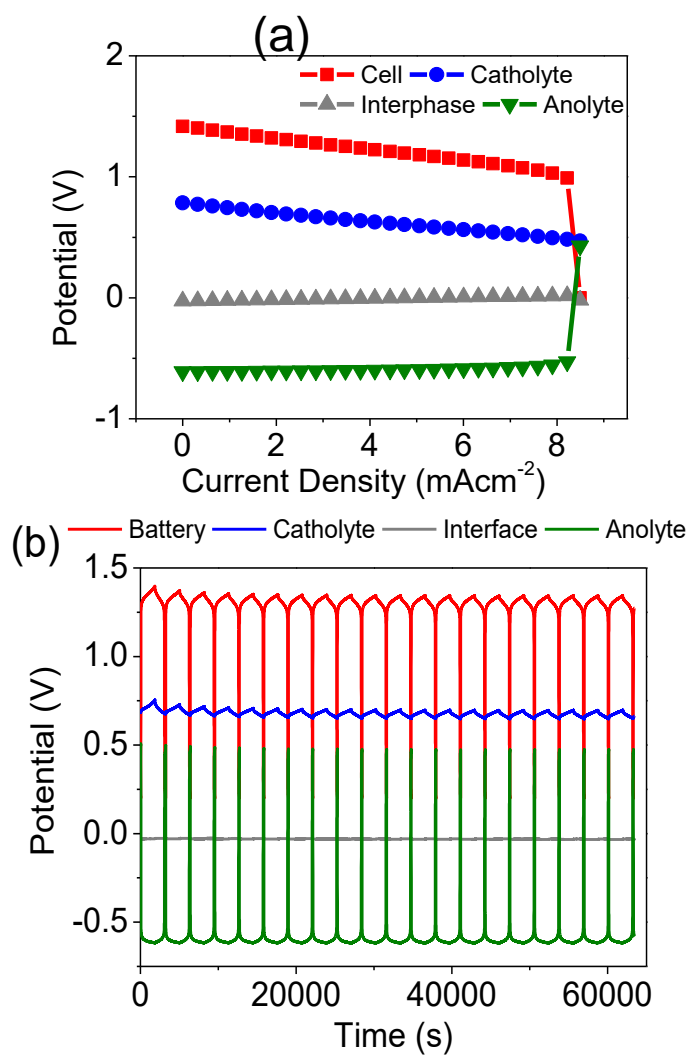

**Figure S5.** [P<sub>44414</sub>]Cl-based Membrane-Free Battery. (a) Discharge Polarization curve. (b) Potential profiles of the battery, catholyte, anolyte and interface over cycling.
